# Supplementary material for: Clinical Evaluation of Universal Efficacy of Mouthwashes in Alleviating Pain and Xerostomia Among Nasopharyngeal Carcinoma Patients: A Prospective Cohort
Source: Research Square preprint supplement (doi:10.21203/rs.3.rs-3632411/v1), 2023-11-21
Supplement: Supplementary file 1 [file 865667d03dc44d2dd16e1a5f.docx]

**PARTICIPANT INFORMATION SHEET AND INFORMED CONSENT FORM**

*(for adult subjects and interventional studies)*

1. **Title of study**:A study on clinical significance of oral mouthwashes used in the prevention and treatment of oral mucositis induced by chemo-radiation in nasopharyngeal carcinomas.
2. **Name of investigator and institution:** Rhubain Mageswaran & Ang Zen Yang, Hospital Kuala Lumpur
3. **Name of sponsor**: Self-sponsored
4. **Introduction:**

You are invited to participate in a research study because you have radiation induced mucositis that requires use of oral mouthwashes. The details of the research trial are described in this document. It is important that you understand why the research is being done and what it will involve. Please take your time to read through and consider this information carefully before you decide if you are willing to participate. Ask the study staff if anything is unclear or if you like more information. After you are properly satisfied that you understand this study, and that you wish to participate, you must sign this informed consent form. To participate in this study, you may be required to provide your doctor with information on your health history; you may harm yourself if you are not truthful with the information provided.

Your participation in this study is voluntary. You do not have to be in this study if you do not want to. You may also refuse to answer any questions you do not want to answer. If you volunteer to be in this study, you may withdraw from it at any time. If you withdraw, any data collected from you up to your withdrawal will still be used for the study. Your refusal to participate or withdrawal will not affect any medical or health benefits to which you are otherwise entitled.

This study has been approved by the Medical Research and Ethics Committee, Ministry of Health Malaysia.

1. **What is the purpose of the study?**

The purpose of this study is to current differential factors involving the use of oral mouthwashes for the treatment of oral mucositis. This research is necessary because it optimizes the treatment of mucositis with respect to the usage of oral mucositis

A total of 75 subjects like you from various parts of the oncology wards will be participating in this study; in HKL, there will be about 75 subjects. The whole study will last about 7 weeks and your participation will be about for 30 minutes each session.

1. **What will happen if I decide to take part?**

You will be interviewed on your usage of oral mouthwashes and its responsiveness. You will be questioned on the sequence, volume, duration and frequency of mouthwashes being used. You are required to provide feedback in terms of scoring scales for each mouthwash on pain score, mouth dryness, infection rates and overall effectiveness. Information on preference or hindrance towards mouthwashes will be assessed. The interview will be approximately 30 minutes and the same interview will be repeated twice.

There is minimal risk of participation in the study as it only involves a questionnaire, you may decline to answer any questions you are uncomfortable with.

1. **What are my responsibilities when taking part in this study?**

It is important that you answer all of the questions asked by the study staff honestly and completely. If your condition or circumstances change during the study, you must tell the study doctor. There may be certain medications that you cannot take while participating in this study. The doctor will discuss those medications with you. You must not take any other medications without consulting your study doctor. You must inform your study doctor immediately if you make any changes to any of your current treatments, even those which you have been taking for a long time.

It is very important that your study doctor be informed very rapidly of any eventual changes to your health during your participation in the study. For your own security, it is important that you follow your study doctor’s instructions throughout the entire duration of the study.

1. **What kind of treatment will I receive after my participation in the trial?**

No study product will be given to you at the end of your participation in the study. Whether you complete the study or withdraw early, your doctor will discuss the best alternatives for your future treatment with you. You will not be paid for your participation in this study.

1. **What are the benefits of being in this study?**

There may or may not be any benefits to you. Information obtained from this study will help improve the treatment or management of other participants with the same disease or condition.

1. **Will my medical information be kept private?**

All your information obtained in this study will be kept and handled in a confidential manner, in accordance with applicable laws and/or regulations. When publishing or presenting the study results, your identity will not be revealed without your expressed consent. Individuals involved in this study and in your medical care, qualified monitors and auditors, the sponsor or its affiliates and governmental or regulatory authorities may inspect and copy your medical records, where appropriate and necessary. If new information relating to consent should arise in future you will be asked to reconsent.

1. **Who should I call if I have questions?**

If you have any questions about the study or if you think you have a study related injury and you want information about treatment, please contact the study doctor, Rhubain Mageswaran at telephone number 016-3680907

If you have any questions about your rights as a participant in this study, please contact: The Secretary, Medical Research & Ethics Committee, Ministry of Health Malaysia, at telephone number 03-3362 8407/8205/8888/8100.

**INFORMED CONSENT FORM**

Title of Study: A study on clinical significance of oral mouthwashes used in the prevention and treatment of oral mucositis induced by chemo-radiation in nasopharyngeal carcinomas.

By signing below I confirm the following:

- I have been given oral and written information for the above study and have read and understood the information given.
- I have had sufficient time to consider participation in the study and have had the opportunity to ask questions and all my questions have been answered satisfactorily.
- I understand that my participation is voluntary and I can at anytime free withdraw from the study without giving a reason and this will in no way affect my future treatment. I am not taking part in any other research study at this time. I understand the risks and benefits, and I freely give my informed consent to participate under the conditions stated. I understand that I must follow the study doctor’s (investigator’s) instructions related to my participation in the study.
- I understand that study staff, qualified monitors and auditors, the sponsor or its affiliates, and governmental or regulatory authorities, have direct access to my medical record in order to make sure that the study is conducted correctly and the data are recorded correctly. All personal details will be treated as STRICTLY CONFIDENTIAL
- I will receive a copy of this subject information/informed consent form signed and dated to bring home.
- I agree/disagree* for my family doctor to be informed of my participation in this study. *(*delete which is not applicable)*

**Subject:**

| Signature: |  | I/C number: |  |
| --- | --- | --- | --- |
| Name: |  | Date: |  |

**Investigator conducting informed consent:**

| Signature: |  | I/C number: |  |
| --- | --- | --- | --- |
| Name: |  | Date: |  |

**Impartial witness:** *(Required if subject is illiterate and contents of participant information sheet is orally communicated to subject)*

| Signature: |  | I/C number: |  |
| --- | --- | --- | --- |
| Name: |  | Date: |  |
