# Supplementary material for: Clinical Evaluation of Universal Efficacy of Mouthwashes in Alleviating Pain and Xerostomia Among Nasopharyngeal Carcinoma Patients: A Prospective Cohort
Source: Research Square preprint supplement (doi:10.21203/rs.3.rs-3632411/v1), 2023-11-21
Supplement: Supplementary file 2 [file a9dd3e46a6de9d092d0ad7a7.docx]

**Appendices**

**Table 5** Constituents of each mouthwash

| Mouthwash | Brand name | Constituents |
| --- | --- | --- |
| Aspirin | - | 1 tablet of 300mg diluted in 250ml NS |
| Benzydamine | Difflam® Solution | Each 15 ml contains Benzydamine 22.5mg d alcohol 10% w/v. Methylhydroxybenzoate 0.1% w/v preservative |
| Lignocaine | Xylocaine® Viscous Oral Topical Solution | Each ml contains Lignocaine HCl 20mg (2% w/v). Methylhydroxybenzoate 0.12% w/v preservative, Propyl hydroxybenzoate 0.012% w/v preservative |
| Magic Mouthwash | i. Xylocaine® Viscous Oral Topical Solution  ii. Pharmaniaga Diphenhydramine Expectorant  iii. Rexom Mist. Magnesium Trisilicate | Each 15ml contains:  i. 5ml of Xylocaine® Viscous Oral Topical Solution,  ii. 5ml of expectorant containing Diphenhydramine HCl 12.5mg and  Ammonium Chloride 135mg, sodium benzoate 0.1% w/v preservative, and  iii. 5ml of mixture containing Magnesium Trisilicate (250mg), Sodium Bicarbonate (250mg), Light Magnesium Carbonate (250mg), Sodium methyl paraben 0.14%w/v preservative, Sodium propyl paraben 0.08% w/v preservative, Cetylpyridium chloride 0.1% w/v, Chloroform 0.25% v/v |
| Oral7® | Oral7® | Aqua monopropylene glycol, xylitol, hydrogenated starch, hydrosylate, pooxamer 407, hydroxyethyl cellulose, sodium benzoate preservative, Aloe barbadensis leaf juice powder, metha piperita, benzoic acid, zinc gluconate, lactoferrin, lysozyme, lactoperoxidase, potassium thicynate, calcium lactate, glucose oxidase. |
| Sodium bicarbonate | - | 5g NaHCO3 in 250mL NS or 250mL water |
| Nystatin | Tystatin® Oral Suspension | 100,000 units (1ml) contain methyl paraben 1.8mg & propyl paraben 0.2mg as preservatives, and the following inactive ingredients: polyethylene glycol 1500, microcrystalline cellulose, carboxymethylcellulose sodium, saccharin sodium, glycerin, polysorbate 80, raspberry and vanilla flavor. |

**Table 6** Recommended dose, frequency and duration of mouthwashes at study site

| Mouthwash | Median dose (mL) | Median frequency | Median duration (second) |
| --- | --- | --- | --- |
| Lignocaine 2% | 15 | Three times daily | 30 |
| Magic Mouthwash | 15 | Three times daily | 30 |
| Benzydamine | 15 | Three times daily | 30 |
| Aspirin | 15 | Three times daily | 30 |
| Sodium bicarbonate (NaHCO3) | 15 | Three times daily | 30 |
| Oral7® | 15 | Three times daily | 30 |
| Nystatin | 5 | Four times daily (and swallowed) | 30 |

**Table 7** Modified Xerostomia Scoring Scale

| Modified Xerostomia Scoring Scale | Descriptions |
| --- | --- |
| 0 | No mouth dryness, no difficulties in swallowing food. |
| 1 | Mild: mild mouth dryness occasionally, sips on liquid to aid in swallowing dry food, minimal discomfort through the day. |
| 2 | Moderate: Mouth dryness frequently, frequently thirsty and sips on liquid, mild difficulties in swallowing any food, moderate discomfort through the day. |
| 3 | Severe: Severe mouth dryness throughout the day, constantly trying to wet mucosa or sips on fluids, severe difficulties in swallowing any food, severe discomfort throughout the day. |
