# Supplementary material for: Clinical Evaluation of Universal Efficacy of Mouthwashes in Alleviating Pain and Xerostomia Among Nasopharyngeal Carcinoma Patients: A Prospective Cohort
Source: Research Square preprint supplement (doi:10.21203/rs.3.rs-3632411/v1), 2023-11-21
Supplement: Supplementary file 3 [file e63bbabbf80ba67581f3c404.docx]

**RISALAH MAKLUMAT PESERTA DAN**

**BORANG PERSETUJUAN atau KEIZINAN PESERTA**

*(untuk subjek dewasa dan penyelidikan intervensi)*

1. **Tajuk penyelidikan**: Penyelidikan berkaitan pengunaan ubat berkumuh untuk rawatan oral mucositis bagi patient yang menerima rawatan kimo-radiasi dalam nasopharyngeal kanser.
2. **Nama Institusi and Nama Penyelidik:** Rhubain Mageswaran & Ang Zen Yang, Hospital Kuala Lumpur.
3. **Nama Penaja**: Tajaan Sendiri
4. **Pengenalan:**

Anda telah dijemput untuk menyertai penyelidikan ini kerana anda mempunyai mucositis disebabkan rawatan kimo-radiasi yang memerlukan penggunaan ubat berkumuh*.* Risalah ini menjelaskan hal-hal berkenaan penyelidikan tersebut dengan lebih mendalam dan terperinci. Amat penting anda memahami mengapa penyelidikan ini dilakukan dan apa yang dilakukan dalam penyelidikan ini. Sila ambil masa yang secukupnya untuk membaca dan mempertimbangkan dengan teliti penerangan yang diberi sebelum anda bersetuju untuk menyertai penyelidikan ini. Jika ada sebarang kemusykilan ataupun maklumat lanjut yang anda ingin tahu, anda boleh bertanya dengan mana-mana kakitangan yang terlibat dalam penyelidikan ini. Setelah anda berpuashati bahawa anda memahami penyelidikan ini, dan anda berminat untuk turut serta, anda dikehendaki untuk menandatangani Borang Persetujuan atau Keizinan Peserta, pada muka surat akhir risalah ini. Untuk menyertai penyelidikan ini, anda perlu memberi doktor anda maklumat sejarah kesihatan ataupun penyakit anda yang lalu; jika anda tidak berterus terang anda mungkin boleh menimbulkan masalah pada diri anda di kemudian hari.

Penyertaan anda dalam penyelidikan ini adalah secara sukarela. Anda tidak perlu menyertai penyelidikan ini jika anda tidak mahu. Anda juga mempunyai hak untuk tidak menjawab mana-mana soalan yang anda tidak mahu jawab. Anda juga boleh menarik diri daripada penyelidikan ini pada bila-bila masa sahaja. Jika anda menarik diri, segala maklumat yang telah diperolehi sebelum anda menarik diri tetap akan digunakan dalam penyelidikan ini. Jika anda tidak mahu menyertai ataupun menarik diri dari penyelidikan ini, tindakan anda tidak akan menjejaskan segala hak dan keistimewaan perubatan kesihatan yang selayaknya anda terima.

Penyelidikan ini telah mendapat kelulusan Jawatankuasa Etika dan Penyelidikan Perubatan, Kementerian Kesihatan Malaysia.

1. **Apakah tujuan penyelidikan ini dilakukan?**

Tujuan penyelidikan ini dilakukan adalah mengkaji factor penggunaan ubat berkumuhbagi merawat mucositis. Penyelidikan ini diperlukan kerana bagi mendapat rawatan optimum mucositis dari segi pengunnan ubat berkumuh.

Sejumlah75 peserta seperti anda daripada segenap pelusuk wad onkologi akan menyertai penyelidikan ini; di HKL dianggarkan 75 peserta yang akan ambil bahagian *.* Penyelidikan ini akan berlangsung selama 7 minggu dan tempoh pembabitan anda dianggarkan selama 30 minit setiap sesi.

1. **Apakah yang terjadi sekiranya saya bersetuju untuk menyertai penyelidikan ini?**

Anda akan ditemu bual dalam penggunaan rawatan ubat berkumuh dan keberkesananya. Anda akan disoal mengenai urutan, isipadu, jangka masa, dan kekerapan penggunaan ubat kumuh. Anda juga diminta memberi maklum balas berdasarkan skala bernombor untuk setiap ubat kumuh mengenai tahap keaskitan, kekeringan mulut, infeksi dan keberkesanan keseluruhannya. Informasi terhadap ubat kumuh yang disukai dan dielakkan kaan dicatat. Jangka masa temu bual adalah selama 30 minit dan temu bual yang sama akan di buat 2 kali lagi.

Penyertaan anda dalam penyelidikan ini adalah minima kerana ianya temu bual sahaja, jika ada soalan yang anda kurang selesa anda boleh menolak.

1. **Apakah tanggungjawab saya sewaktu menyertai penyelidikan ini?**

Amat penting anda menjawab kesemua soalan yang ditanyakan oleh kakitangan penyelidikan dengan jujur dan lengkap . Jika keadaan atau kesihatan anda berubah sepanjang penyelidikan ini, anda mesti memberitahu doktor penyelidikan anda . Mungkin terdapat ubat-ubat yang tidak boleh anda ambil sepanjang penyertaan anda dalam penyelidikan ini . Doktor akan berbincang dengan anda mengenai ubat-ubat itu . Anda tidak boleh mengambil apa-apa ubat tanpa berbincang terlebih dahulu dengan doktor penyelidikan anda . Anda mesti memberitahu doktor penyelidikan anda dengan segera, sekiranya anda membuat sebarang perubahan dalam rawatan yang sedia ada ( yang sedang anda ambil), walaupun jika anda telah lama mengambil ubat tersebut .

Adalah amat penting untuk memberitahu dengan segera kepada doktor penyelidikan anda jika berlaku sebarang perubahan pada kesihatan anda sepanjang penyertaan anda dalam penyelidikan ini. Demi keselamatan anda, adalah juga amat penting anda mengikut semua arahan yang diberikan oleh doktor penyelidikan anda sepanjang penyelidikan ini dijalankan.

1. **Apakah jenis rawatan yang akan saya terima selepas menyertai penyelidikan ini ?**

Produk penyelidikan tidak akan diberikan lagi kepada anda selepas tamat tempoh penyelidikan. Sama ada anda mengikuti penyelidikan ini dengan sepenuhnya ataupun menarik diri di pertengahan penyelidikan, doktor anda akan berbincang dengan anda mengenai rawatan alternatif yang terbaik untuk rawatan anda di masa hadapan. Anda tidak akan dibayar untuk menyertai penyelidikan ini.

1. **Apakah manfaatnya saya menyertai kajian ini?**

Penyelidikan ini mungkin akan mendatangkan manfaat ataupun langsung tiada memberi apa-apa manfaat kepada anda. Segala maklumat yang diperolehi daripada penyelidikan ini akan dapat membantu dalam penambahbaikan kaedah rawatan atau pengurusan peserta lain yang menghidap penyakit atau masalah kesihatan yang sama dengan anda.

**10**. **Adakah maklumat perubatan saya akan dirahsiakan ?**

Segala maklumat anda yang diperolehi dalam penyelidikan ini akan disimpan dan dikendalikan secara sulit, bersesuaian dengan peraturan-peraturan dan/ atau undang-undang yang berkenaan. Sekiranya hasil penyelidikan ini diterbitkan atau dibentangkan kepada orang ramai, identiti anda tidak akan didedahkan tanpa kebenaran anda terlebih dahulu. Pihak-pihak tertentu seperti individu yang terlibat dalam penyelidikan dan rawatan perubatan anda, juruaudit dan jurupantau yang terlatih, pihak penaja atau pihak gabungannya, pihak berkuasa kerajaan atau undang-undang, boleh memeriksa dan membuat salinan laporan perubatan anda jika berkenaan dan diperlukan. Jika informasi baru berkenaan kebenaraan anda pada masa akan datang, anda akan diberi tahu dan kebenaran semula akan diambil.

1. **Siapakah yang perlu saya hubungi sekiranya saya mempunyai sebarang pertanyaan?**

Anda boleh menghubungi doktor penyelidikan ini Rhubain Mageswaran pada sambungan telefon 016-3680907 sekiranya anda mempunyai sebarang pertanyaan mengenai penyelidikan ini atau jika anda mengesyaki anda mengalami kecederaan yang terhasil daripada penyelidikan ini dan anda mahukan maklumat tentang rawatannya.

Jika anda mempunyai sebarang pertanyaan berkaitan dengan hak-hak anda sebagai peserta dalam penyelidikan ini, sila hubungi: Setiausaha,  Jawatankuasa Etika & Penyelidikan Perubatan, Kementerian Kesihatan Malaysia, melalui talian telefon 03-3362 8407/8205/8888/8100

**BORANG PERSETUJUAN/ KEIZINAN PESERTA**

Tajuk Penyelidikan : Penyelidikan berkaitan pengunaan ubat berkumuh untuk rawatan oral mucositis bagi patient yang menerima rawatan kimo-radiasi dalam nasopharyngeal kanser.

Dengan menandatangani di bawah, saya mengesahkan bahawa :

- Saya telah diberi maklumat tentang penyelidikan di atas secara lisan dan bertulis and saya telah membaca dan memahami segala maklumat yang diberikan dalam risalah ini.
- Saya telah diberikan masa yang secukupnya untuk mempertimbangkan penyertaan saya dalam penyelidikan ini dan telah diberi peluang untuk bertanyakan soalan dan semua persoalan saya telah dijawab dengan sempurna dan memuaskan.
- Saya juga faham bahawa penyertaan saya adalah secara sukarela dan pada bila-bila masa saya bebas menarik diri daripada penyelidikan ini tanpa harus memberi sebarang alasan dan ianya sama sekali tidak akan menjejaskan rawatan perubatan saya pada masa akan datang. Saya tidak mengambil bahagian dalam mana-mana penyelidikan lain pada masa ini. Saya juga memahami tentang risiko dan manfaat penyelidikan ini dan saya secara sukarela memberi persetujuan untuk menyertai penyelidikan ini di bawah syarat-syarat yang telah dinyatakan di atas. Saya faham saya harus mematuhi nasihat dan arahan yang berkaitan dengan penyertaan saya dalam penyelidikan ini daripada doktor penyelidikan (penyelidik) .
- Saya faham bahawa kakitangan penyelidikan, pemantau dan juruaudit terlatih , pihak penaja atau gabungannya, dan pihak berkuasa kerajaan atau undang-undang, mempunyai akses langsung dan boleh menyemak laporan perubatan saya bagi memastikan penyelidikan ini dijalankan dengan betul dan data direkodkan dengan betul. Segala maklumat dan data peribadi akan dianggap sebagai SULIT.
- Saya akan menerima satu salinan ‘Risalah Maklumat Peserta dan Borang Persetujuan atau Keizinan Peserta’ yang telah lengkap dengan tarikh dan tandatangan untuk dibawa pulang ke rumah.
  Saya bersetuju/ tidak bersetuju* untuk doktor yang merawat keluarga saya diberitahu tentang penyertaan saya dalam penyelidikan ini.

| Tandatangan: |  | Nombor K/P: |  |
| --- | --- | --- | --- |
| Nama: |  | Tarikh : |  |

**Penyelidik yang mengendalikan proses menandatangani borang keizinan:**

| Tandatangan: |  | Nombor K/P: |  |
| --- | --- | --- | --- |
| Nama: |  | Tarikh : |  |

**Saksi tidak-berpihak/adil:** *(Diperlukan; jika subjek adalah buta huruf dan kandungan risalah maklumat peserta disampaikan secara lisan kepada subjek)*

| Tandatangan: |  | Nombor K/P: |  |
| --- | --- | --- | --- |
| Nama: |  | Tarikh : |  |
